# Supplementary material for: Co-Design/Co-Development and Evaluation of an Online Frailty Check Application for Older Adults: Participatory Action Research With Older Adults
Source: Preprints.org preprint supplement (doi:10.20944/preprints202305.0874.v1), 2023-05-12
Supplement: Supplementary file 1 [file Online Supplementary Data 230405.docx]

**Online Supplementary Data**

**Co-design/Co-development and evaluation of online frailty check application for older adults: participatory action research with older adults**

Bo-Kyung Son1, 2, 3, Takahiro Miura1,4, Ken-ichiro Yabu1,5, Yuka Sumikawa6, Dongyool Kim7, Weida Lyu3, Yingxue Yang8, Moeko Tanaka6, Tomoki Tanaka1, Yasuyo Yoshizawa1, Katsuya Iijima1, 2, 3

1 *Institute of Gerontology, The University of Tokyo, Tokyo, Japan*

*2 Institute for Future Initiatives, The University of Tokyo, Tokyo, Japan*

*3 Department of Geriatric Medicine, Graduate School of Medicine, The University of Tokyo, Japan*

*4Human Augmentation Research Center (HARC), National Institute of Advanced Industrial Science and Technology (AIST), Kashiwa, Japan*

*5Research Center for Advanced Science and Technology, The University of Tokyo. Tokyo*

*6Division of Health Sciences and Nursing, Graduate School of Medicine, The University of Tokyo, Tokyo*

*7Department of Agribusiness Management, Faculty of International Agriculture and Food Studies, Tokyo University of Agriculture*

*8Graduate School of Education, The University of Tokyo, Tokyo, Japan*

Supplementary table 1. Items of 11 checks


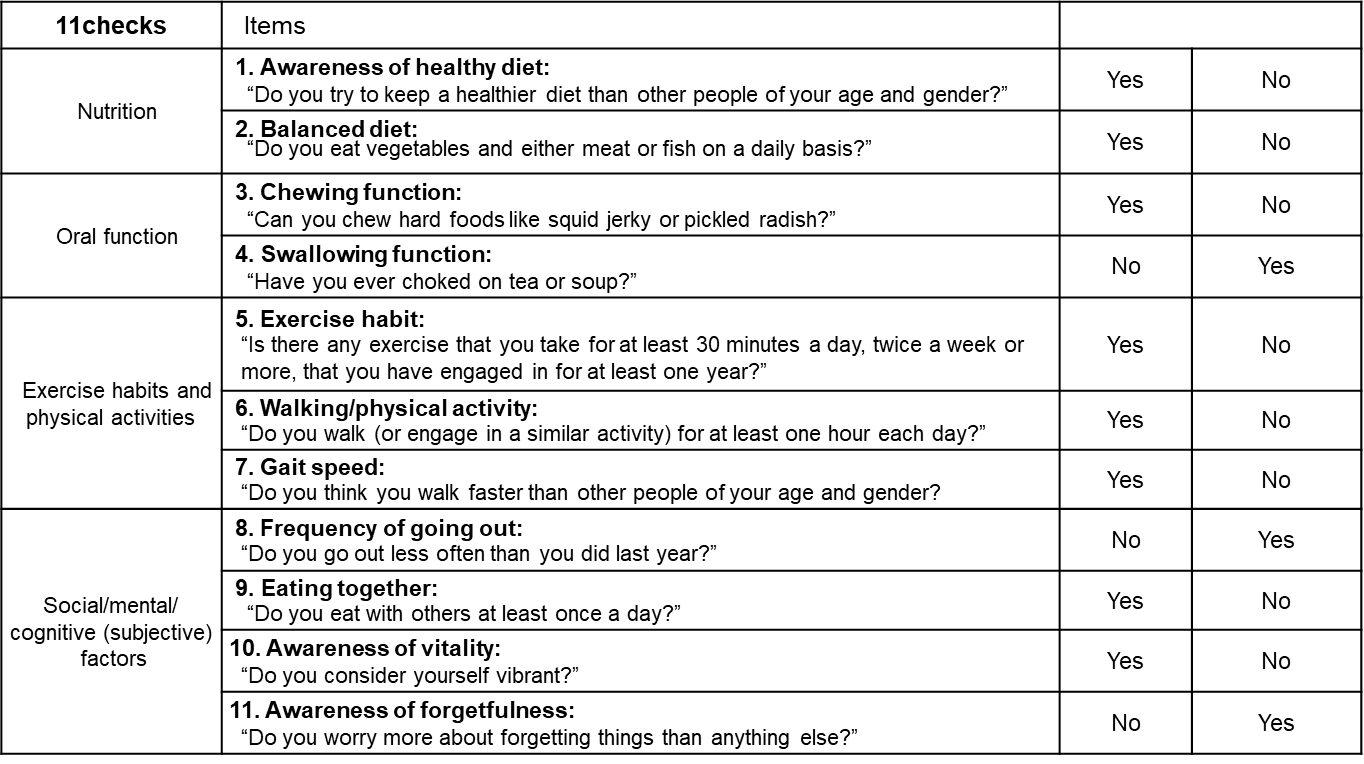


Supplementary table 2. Reliability and interaction quality of online frailty checkup application


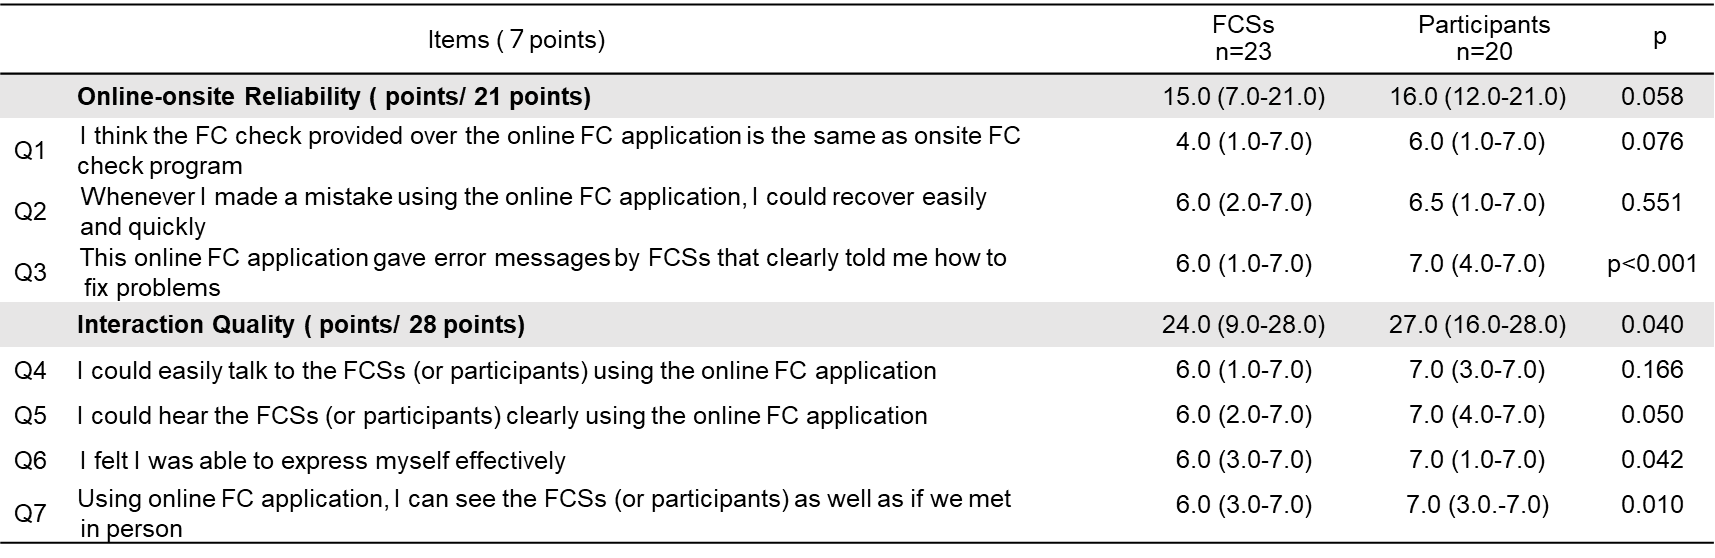


*Values are presented as median (min-max). Mann-Whitney test. Cronbach’s a = 0.809
